# Supplementary material for: An Investigation into the Societal Attitudes and Acceptance of Treated Wastewater Reuse in an Area Experiencing Water Scarcity
Source: Research Square preprint supplement (doi:10.21203/rs.3.rs-5780361/v1), 2025-04-21
Supplement: Supplementary file 1 [file 2eb4244a7fd554551ea854ae.pdf]

**Table 1.** Participants demographic information.

|   | Demographic information                   | N   | Percent |
|---|-------------------------------------------|-----|---------|
| 1 | <u>Sex:</u>                               |     |         |
|   | Male                                      | 326 | 64.3    |
|   | Female                                    | 181 | 35.7    |
| 2 | <u>Age:</u>                               |     |         |
|   | 18-25                                     | 103 | 20.3    |
|   | 25-30                                     | 152 | 30.0    |
|   | 30-35                                     | 101 | 19.9    |
|   | 35-40                                     | 50  | 9.9     |
|   | 40-45                                     | 37  | 7.3     |
|   | 45-50                                     | 25  | 4.9     |
|   | 50-55                                     | 23  | 4.5     |
|   | 55-60                                     | 11  | 2.2     |
|   | more than 60                              | 5   | 1.0     |
| 3 | <u>Marital Status</u>                     |     |         |
|   | Married                                   | 275 | 54.2    |
|   | Unmarried                                 | 227 | 44.8    |
|   | Divorced                                  | 3   | .6      |
|   | Widowed/Widow                             | 2   | .4      |
| 4 | <u>Occupation:</u>                        |     |         |
|   | Doctor                                    | 26  | 5.1     |
|   | Engineer                                  | 62  | 12.2    |
|   | Lawyer                                    | 9   | 1.8     |
|   | Government employee                       | 183 | 36.1    |
|   | Teacher                                   | 51  | 10.1    |
|   | Private employer                          | 73  | 14.4    |
|   | Student                                   | 65  | 12.8    |
|   | Other                                     | 38  | 7.5     |
| 5 | <u>Qualification:</u>                     |     |         |
|   | Primary                                   | 18  | 3.6     |
|   | Intermediate                              | 20  | 3.9     |
|   | Secondary                                 | 80  | 15.8    |
|   | Diploma                                   | 82  | 16.2    |
|   | Undergraduate                             | 216 | 42.6    |
|   | Postgraduate                              | 91  | 17.9    |
| 6 | <u>Is there a child living at home?</u>   |     |         |
|   | Yes                                       | 397 | 78.3    |
|   | No                                        | 110 | 21.7    |
| 7 | <u>No. of children:</u>                   |     |         |
|   | From 1 to 3                               | 288 | 56.8    |
|   | From 4 to 6                               | 93  | 18.3    |
|   | From 7 to 9                               | 11  | 2.2     |
|   | > 9                                       | 5   | 1.0     |
| 8 | <u>Income:</u>                            |     |         |
|   | From 300,000 to 600,000 Iraqi dinars (IQ) | 158 | 31.2    |
|   | From 600,000 to 900,000 IQ                | 90  | 17.8    |
|   | From 900,000 to 1,200,000 IQ              | 57  | 11.2    |
|   | From 1,200,000 to 1,500,000 IQ            | 36  | 7.1     |
|   | More than 1,500,000 IQ                    | 166 | 32.7    |
| 9 | <u>Paying fees</u>                        |     |         |

|    |                                    |     |      |
|----|------------------------------------|-----|------|
|    | Yes                                | 416 | 82.1 |
|    | No                                 | 91  | 17.9 |
| 10 | <u>Amount paying:</u>              |     |      |
|    | 5000-15000 IQ                      | 117 | 23.1 |
|    | 15000-25000 IQ                     | 187 | 36.9 |
|    | 25000-35000 IQ                     | 44  | 8.7  |
|    | 35000-45000 IQ                     | 1   | .2   |
|    | Equal & Greater than 45000 IQ      | 4   | .8   |
| 11 | <u>Sewerage network connected:</u> |     |      |
|    | Yes                                | 412 | 81.3 |
|    | No                                 | 95  | 18.7 |

**Table 2.** Ways Suggested to raise consciousness about water reuse.

| <b>Suggested methods</b>                                  | <b>Number</b> | <b>Percent</b> |
|-----------------------------------------------------------|---------------|----------------|
| Social media                                              | 150           | 39%            |
| Internet advertisements                                   | 60            | 16%            |
| Awareness through the media                               | 75            | 20%            |
| By organising workshops or advisory meetings              | 33            | 9%             |
| Field mobile team campaigns in the cities                 | 29            | 8%             |
| Spreading awareness in universities, schools, and mosques | 10            | 3%             |
| I don't know                                              | 24            | 6%             |
| Total                                                     | 381           | 100%           |

**Table 3.** A synopsis of the participants on questions concerning utilising recycled wastewater for agriculture, industry and commerce, other purposes and purpose of their suppor.

| <b>27-How will you trust using treated wastewater for irrigation</b>             |   |                         |                |                      |                     |          |           |             |
|----------------------------------------------------------------------------------|---|-------------------------|----------------|----------------------|---------------------|----------|-----------|-------------|
|                                                                                  |   | <b>Strongly support</b> | <b>Support</b> | <b>Don't support</b> | <b>I don't know</b> | <b>m</b> | <b>SD</b> | <b>Rank</b> |
| Irrigation of food crops                                                         | N | 137                     | 209            | 83                   | 78                  | 2.20     | 1.005     | 2           |
|                                                                                  | % | 27                      | 41.2           | 16.4                 | 15.4                |          |           |             |
| Irrigation of non-food crops                                                     | N | 149                     | 208            | 71                   | 79                  | 2.16     | 1.017     | 2           |
|                                                                                  | % | 29.4                    | 41             | 14                   | 15.6                |          |           |             |
| Irrigation of public parks                                                       | N | 190                     | 207            | 58                   | 52                  | 1.94     | 0.948     | 2           |
|                                                                                  | % | 37.5                    | 40.8           | 11.4                 | 10.3                |          |           |             |
| Animal crops                                                                     | N | 162                     | 218            | 68                   | 59                  | 2.05     | 0.958     | 2           |
|                                                                                  | % | 32.0                    | 43.0           | 13.4                 | 11.6                |          |           |             |
| Irrigation All crops                                                             | N | 124                     | 182            | 112                  | 89                  | 2.33     | 1.031     | 2           |
|                                                                                  | % | 24.5                    | 35.9           | 22.1                 | 17.6                |          |           |             |
| Average                                                                          |   | 30.1%                   | 40.38%         | 15.46 %              | 14.1%               | 2.1357   | 0.9918    |             |
| <b>28- How confident with using treated wastewater for industry and commerce</b> |   |                         |                |                      |                     |          |           |             |
|                                                                                  |   | <b>Strongly support</b> | <b>Support</b> | <b>Don't support</b> | <b>I don't know</b> | <b>m</b> | <b>SD</b> | <b>Rank</b> |
| Cooling (e.g. cooling of power plants - cooling machines ....)                   | N | 178                     | 189            | 60                   | 80                  | 2.08     | 1.047     | 2           |
|                                                                                  | % | 35.1                    | 37.3           | 11.8                 | 15.8                |          |           |             |
| Construction work (such as: construction work - mixing concrete...)              | N | 166                     | 181            | 87                   | 73                  | 2.13     | 1.029     | 2           |
|                                                                                  | % | 32.7                    | 35.7           | 17.2                 | 14.4                |          |           |             |
| Power plants (e.g. steam production .....)                                       | N | 158                     | 191            | 73                   | 85                  | 2.17     | 1.049     | 2           |
|                                                                                  | % | 31.2                    | 37.7           | 14.4                 | 16.8                |          |           |             |
| Car wash                                                                         | N | 135                     | 198            | 114                  | 60                  | 2.20     | 0.963     | 2           |
|                                                                                  | % | 26.6                    | 39.1           | 22.5                 | 11.8                |          |           |             |
| Clothes Laundries                                                                | N | 67                      | 150            | 219                  | 71                  | 2.58     | 0.889     | 3           |
|                                                                                  | % | 13.2                    | 29.6           | 43.2                 | 14                  |          |           |             |
| Cleaning (street cleaning – cleaning)                                            | N | 160                     | 198            | 87                   | 62                  | 2.10     | 0.984     | 2           |
|                                                                                  | % | 31.6                    | 39.1           | 17.2                 | 12.2                |          |           |             |
| Fire Fighting                                                                    | N | 187                     | 190            | 44                   | 86                  | 2.06     | 1.064     | 2           |
|                                                                                  | % | 36.9                    | 37.5           | 8.7                  | 17                  |          |           |             |
| Average                                                                          |   | 29.6 %                  | 36.6 %         | 19.3 %               | 14.6 %              | 2.1879   | 1.0035    |             |

Table 3. (continued)

| 29- How confident with using treated wastewater for the following purposes                          |   |                  |         |               |              |       |       |      |
|-----------------------------------------------------------------------------------------------------|---|------------------|---------|---------------|--------------|-------|-------|------|
|                                                                                                     |   | Strongly support | Support | Don't support | I don't know | m     | SD    | Rank |
| Artificial lakes                                                                                    | N | 116              | 192     | 130           | 69           | 2.30  | 0.970 | 2    |
|                                                                                                     | % | 22.9             | 37.9    | 25.6          | 13.6         |       |       |      |
| Swimming Pools                                                                                      | N | 55               | 132     | 247           | 73           | 2.67  | 0.854 | 3    |
|                                                                                                     | % | 10.8             | 26.0    | 48.7          | 14.4         |       |       |      |
| Fish Farms                                                                                          | N | 84               | 180     | 167           | 76           | 2.46  | 0.939 | 2    |
|                                                                                                     | % | 16.6             | 35.5    | 32.9          | 15.0         |       |       |      |
| Household uses (e.g. bathing .....)                                                                 | N | 53               | 125     | 263           | 66           | 2.67  | 0.831 | 3    |
|                                                                                                     | % | 10.5             | 24.7    | 51.9          | 13.0         |       |       |      |
| Storage for emergency                                                                               | N | 111              | 201     | 122           | 73           | 2.31  | 0.970 | 2    |
|                                                                                                     | % | 21.9             | 39.6    | 24.1          | 14.4         |       |       |      |
| Drinking animals and birds                                                                          | N | 108              | 211     | 124           | 64           | 2.28  | 0.940 | 2    |
|                                                                                                     | % | 21.3             | 41.6    | 24.5          | 12.6         |       |       |      |
| Washing vegetables and fruits                                                                       | N | 60               | 111     | 279           | 57           | 2.66  | 0.830 | 3    |
|                                                                                                     | % | 11.8             | 21.9    | 55.0          | 11.2         |       |       |      |
| Cooking                                                                                             | N | 44               | 98      | 302           | 63           | 2.76  | 0.779 | 3    |
|                                                                                                     | % | 8.7              | 19.3    | 59.6          | 12.4         |       |       |      |
| Flushing toilet                                                                                     | N | 145              | 234     | 75            | 53           | 2.07  | 0.921 | 2    |
|                                                                                                     | % | 28.6             | 46.2    | 14.8          | 10.5         |       |       |      |
| Average                                                                                             |   | 17 %             | 32.5 %  | 37.5 %        | 13 %         | 2.464 | 0.893 |      |
| 30- The extent to which you support the use of treated wastewater for achieving the following goals |   |                  |         |               |              |       |       |      |
|                                                                                                     |   | Strongly support | Support | Don't support | I don't know | m     | SD    | Rank |
| Preserving the environment                                                                          | N | 248              | 187     | 30            | 42           | 1.74  | 0.901 | 1    |
|                                                                                                     | % | 48.9             | 36.9    | 5.9           | 8.3          |       |       |      |
| Easing pressure on groundwater and high-cost desalinated water                                      | N | 221              | 218     | 24            | 44           | 1.79  | 0.886 | 2    |
|                                                                                                     | % | 43.6             | 43.0    | 4.7           | 8.7          |       |       |      |
| Reducing pollution                                                                                  | N | 246              | 200     | 17            | 44           | 1.72  | 0.889 | 1    |
|                                                                                                     | % | 48.5             | 39.4    | 3.4           | 8.7          |       |       |      |
| Giving up the purchase of chemical fertilisers harmful to Public health                             | N | 258              | 193     | 10            | 46           | 1.69  | 0.894 | 1    |
|                                                                                                     | % | 50.8             | 38.1    | 2             | 9.1          |       |       |      |
| Average                                                                                             |   | 47.95%           | 39.35%  | 4%            | 8.7%         | 1.735 | 0.893 |      |

**Table 4.** T-test outcomes show sex alteration in trust of recycled wastewater utilised for various purposes.

| Purpose                      | Male  |      | Female |      | T-Test  | df  | Sig.  |
|------------------------------|-------|------|--------|------|---------|-----|-------|
|                              | Mean  | SD   | Mean   | SD   |         |     |       |
| Industrial & commercial uses | 14.75 | 5.31 | 16.56  | 5.76 | -3.67** | 505 | 0.000 |
| Different goals              | 21.39 | 5.8  | 23.61  | 6.19 | -4.03** | 505 | 0.000 |
| Irrigation                   | 10.05 | 4.07 | 11.81  | 4.15 | -4.62** | 505 | 0.000 |

\*\* for female

Table 5. Preparing demographic data for one-way ANOVA and Chi-square tests by regrouping it according to age, education level, and income.

| Groups  | Symbol | Demographic parameter |       |                      |                 |                |                        |
|---------|--------|-----------------------|-------|----------------------|-----------------|----------------|------------------------|
|         |        | Age(a)<br>(Years)     |       | Educational level(e) |                 | Income(i) (IQ) |                        |
| Group 1 | G1     | G1a                   | < 35  | G1e                  | Diploma or less | G1i            | 300,000 to 900,000     |
| Group 2 | G2     | G2a                   | 35-50 | G2e                  | Undergraduate   | G1i            | 900,000 to 1200,000    |
| Group 3 | G3     | G3a                   | >= 50 | G3e                  | Postgraduate    | G1i            | 1,200,000 or more than |

**Table 6.** Results from a one-way ANOVA technique summarising the effects of age, education level, and income on people's attitudes regarding using recycled wastewater.

| Question                                                                                        | Groups     |       |        |     |       |                   |        |       |     |      |             |        |        |     |       |
|-------------------------------------------------------------------------------------------------|------------|-------|--------|-----|-------|-------------------|--------|-------|-----|------|-------------|--------|--------|-----|-------|
|                                                                                                 | Age(years) |       |        |     |       | Educations(level) |        |       |     |      | Income (IQ) |        |        |     |       |
|                                                                                                 | Ga         | G1a   | G2a    | G3a | Sig.  | Ge                | G1e    | G2e   | G3e | Sig. | Gi          | G1i    | G2i    | G3i | Sig.  |
| How will you trust using treated wastewater for irrigation?                                     | 1          |       |        |     | 0.17  | 1                 |        |       |     | 0.36 | 1           |        |        |     | 0.436 |
|                                                                                                 | 2          | 1.02  |        |     |       | 2                 | -0.033 |       |     |      | 2           | 0.71   |        |     |       |
|                                                                                                 | 3          | 0.03  | -0.99  |     |       | 3                 | 0.68   | 0.72  |     |      | 3           | -0.037 | -0.75  |     |       |
| How confident with using treated wastewater for industry and commerce?                          | 1          |       |        |     | 0.57  | 1                 |        |       |     | 0.11 | 1           |        |        |     | 0.061 |
|                                                                                                 | 2          | 0.59  |        |     |       | 2                 | 1.03   |       |     |      | 2           | 1.11   |        |     |       |
|                                                                                                 | 3          | -0.53 | -1.133 |     |       | 3                 | 1.09   | 0.057 |     |      | 3           | -0.74  | -1.84  |     |       |
| How confident with using treated wastewater for the following purposes?                         | 1          |       |        |     | 0.4   | 1                 |        |       |     | 0.4  | 1           |        |        |     | 0.134 |
|                                                                                                 | 2          | 1.01  |        |     |       | 2                 | 0.78   |       |     |      | 2           | 1.61   |        |     |       |
|                                                                                                 | 3          | -0.33 | -1.34  |     |       | 3                 | 0.56   | -0.23 |     |      | 3           | -0.06  | -1.68  |     |       |
| The extent to which you support the use of treated wastewater for achieving the following goals | 1          |       |        |     | 0.648 | 1                 |        |       |     | 0.49 | 1           |        |        |     | 0.01* |
|                                                                                                 | 2          | 0.33  |        |     |       | 2                 | -0.17  |       |     |      | 2           | 0.32   |        |     |       |
|                                                                                                 | 3          | 0.33  | -0.004 |     |       | 3                 | 0.31   | 0.48  |     |      | 3           | -0.73* | -1.05* |     |       |
