# Supplementary material for: An Investigation into the Societal Attitudes and Acceptance of Treated Wastewater Reuse in an Area Experiencing Water Scarcity
Source: Research Square preprint supplement (doi:10.21203/rs.3.rs-5780361/v1), 2025-04-21
Supplement: Supplementary file 2 [file a0a9595752cf0e666c310554.pdf]

| Section 1: Demographic information |                                                                                                |                                                              |  |                                        |                                 |                                                                |                                |                                           |                                     |                                                                           |  |
|------------------------------------|------------------------------------------------------------------------------------------------|--------------------------------------------------------------|--|----------------------------------------|---------------------------------|----------------------------------------------------------------|--------------------------------|-------------------------------------------|-------------------------------------|---------------------------------------------------------------------------|--|
| Q1                                 | Name                                                                                           | Optional                                                     |  |                                        |                                 |                                                                |                                |                                           |                                     |                                                                           |  |
| Q2                                 | Sex                                                                                            | <input type="radio"/> Male                                   |  |                                        | <input type="radio"/> Female    |                                                                |                                |                                           |                                     |                                                                           |  |
| Q3                                 | What is your age?                                                                              | <input type="radio"/>                                        |  |                                        |                                 |                                                                |                                |                                           |                                     |                                                                           |  |
| Q4                                 | Marital Status                                                                                 | <input type="radio"/> Married                                |  |                                        | <input type="radio"/> Unmarried |                                                                | <input type="radio"/> Divorced |                                           | <input type="radio"/> Widowed/Widow |                                                                           |  |
| Q5                                 | Place of residence (governorate)                                                               |                                                              |  |                                        |                                 |                                                                |                                |                                           |                                     |                                                                           |  |
| Q6                                 | Religion                                                                                       | <input type="radio"/> Muslim                                 |  |                                        | <input type="radio"/> Christian |                                                                |                                | <input type="radio"/> Other               |                                     |                                                                           |  |
| Q7                                 | Occupation                                                                                     | <input type="radio"/> Doctor                                 |  | <input type="radio"/> Engineer         |                                 | <input type="radio"/> Lawyer                                   |                                | <input type="radio"/> Government employee |                                     |                                                                           |  |
|                                    |                                                                                                | <input type="radio"/> Teacher                                |  | <input type="radio"/> Private employer |                                 | <input type="radio"/> Student                                  |                                | <input type="radio"/> Other               |                                     |                                                                           |  |
| Q8                                 | Qualification                                                                                  | <input type="radio"/> Primary                                |  | <input type="radio"/> Intermediate     |                                 | <input type="radio"/> Secondary                                |                                | <input type="radio"/> Diploma             |                                     | <input type="radio"/> Undergraduate<br><input type="radio"/> Postgraduate |  |
| Q9                                 | Are there any children living with you at home?                                                |                                                              |  |                                        | <input type="radio"/> Yes       |                                                                |                                | <input type="radio"/> No                  |                                     |                                                                           |  |
| Q10                                | If your answer to question (9) is "yes", how many children are there ?                         |                                                              |  | <input type="radio"/> From 1 to 3      |                                 | <input type="radio"/> From 4 to 6                              |                                | <input type="radio"/> From 7 to 9         |                                     | <input type="radio"/> > 9                                                 |  |
| Q11                                | What is your monthly salary in Iraqi dinars?                                                   | <input type="radio"/> From 300,000 to 600,000 Iraqi dinars   |  |                                        |                                 | <input type="radio"/> From 600,000 to 900,000 Iraqi dinars     |                                |                                           |                                     |                                                                           |  |
|                                    |                                                                                                | <input type="radio"/> From 900,000 to 1,200,000 Iraqi dinars |  |                                        |                                 | <input type="radio"/> From 1,200,000 to 1,500,000 Iraqi dinars |                                |                                           |                                     | <input type="radio"/> More than 1,500,000 Iraqi dinars                    |  |
| Q12                                | Are you paying for municipal water consumption?                                                |                                                              |  | <input type="radio"/> Yes              |                                 | No                                                             |                                |                                           |                                     |                                                                           |  |
| Q13                                | How much money you pay for municipal water consumption in your home per month in Iraqi dinars? |                                                              |  |                                        |                                 |                                                                |                                |                                           |                                     |                                                                           |  |
| Q14                                | Is your home connected to the main sewerage network?                                           |                                                              |  | <input type="radio"/> Yes              |                                 |                                                                | <input type="radio"/> No       |                                           |                                     |                                                                           |  |

| Section 2: Participants' awareness of water resources and wastewater reuse |                                                                                                                                        |  |  |  |                                            |  |                                    |  |                                    |  |
|----------------------------------------------------------------------------|----------------------------------------------------------------------------------------------------------------------------------------|--|--|--|--------------------------------------------|--|------------------------------------|--|------------------------------------|--|
| Q15                                                                        | Do you have any knowledge about water available in your country?                                                                       |  |  |  | <input type="radio"/> Yes                  |  | <input type="radio"/> No           |  | <input type="radio"/> I don't know |  |
| Q15-1                                                                      | If your response to question (15) is "yes", In your opinion, does Iraq have an inadequate supply of natural water resources ?          |  |  |  | <input type="radio"/> Yes                  |  | <input type="radio"/> No           |  | <input type="radio"/> I don't know |  |
| Q16                                                                        | Is it necessary to reduce water consumption in Iraq, in your opinion ?                                                                 |  |  |  | <input type="radio"/> Yes                  |  | <input type="radio"/> No           |  | <input type="radio"/> I don't know |  |
| Q17                                                                        | Do you take any measures to conserve water in your household use?                                                                      |  |  |  | <input type="radio"/> Yes                  |  | <input type="radio"/> No           |  |                                    |  |
| Q18                                                                        | If your response to question (17) is "yes", answer the following:                                                                      |  |  |  |                                            |  |                                    |  |                                    |  |
| Q18-1                                                                      | Replaced all devices and fixtures with water saving models                                                                             |  |  |  | <input type="radio"/> Always               |  | <input type="radio"/> Sometimes    |  | <input type="radio"/> Never        |  |
| Q18-2                                                                      | Replaced all standard kitchen taps with economical taps                                                                                |  |  |  | <input type="radio"/> Always               |  | <input type="radio"/> Sometimes    |  | <input type="radio"/> Never        |  |
| Q18-3                                                                      | Water saving (e.g. when cleaning vegetables - bathing .....)                                                                           |  |  |  | <input type="radio"/> Always               |  | <input type="radio"/> Sometimes    |  | <input type="radio"/> Never        |  |
| Q18-4                                                                      | Replaced traditional toilets with modern models that consume less water                                                                |  |  |  | <input type="radio"/> Always               |  | <input type="radio"/> Sometimes    |  | <input type="radio"/> Never        |  |
| Q19                                                                        | Do you have any background knowledge on treated wastewater ?                                                                           |  |  |  | <input type="radio"/> Very familiar        |  | <input type="radio"/> Familiar     |  | <input type="radio"/> Unfamiliar   |  |
|                                                                            |                                                                                                                                        |  |  |  | <input type="radio"/> Very unfamiliar      |  | <input type="radio"/> I don't know |  |                                    |  |
| Q20                                                                        | What sources have you used to learn about treated wastewater reuse ?                                                                   |  |  |  | <input type="radio"/> TV                   |  | <input type="radio"/> Internet     |  | <input type="radio"/> Journal      |  |
|                                                                            |                                                                                                                                        |  |  |  | <input type="radio"/> Environmental groups |  | <input type="radio"/> Friend       |  | <input type="radio"/> Family       |  |
| Q21                                                                        | From your different backgrounds, how would you suggest the communication with the public to be when implementing this type of project? |  |  |  |                                            |  |                                    |  |                                    |  |

| Section 3: Respondent's attitude towards the reuse of treated wastewater |                                                                                                                 |                                              |  |                                               |  |                                      |  |
|--------------------------------------------------------------------------|-----------------------------------------------------------------------------------------------------------------|----------------------------------------------|--|-----------------------------------------------|--|--------------------------------------|--|
| Q22                                                                      | Are you in favour of using recycled wastewater for some purposes ?                                              | <input type="radio"/> I strongly agree       |  | <input type="radio"/> I agree                 |  | <input type="radio"/> I don't agree  |  |
|                                                                          |                                                                                                                 | <input type="radio"/> I refuse               |  | <input type="radio"/> I strongly refuse       |  |                                      |  |
| Q23                                                                      | Would you be open to having a central system installed in your home ?                                           | <input type="radio"/> Yes                    |  | <input type="radio"/> No                      |  | <input type="radio"/> May be         |  |
| Q24                                                                      | If your answer for question (23) is "yes or maybe", how much the extra monthly fees will you be willing to pay? |                                              |  |                                               |  |                                      |  |
| Q25                                                                      | How will you trust the safety criteria of treated wastewater that you can use?                                  | <input type="radio"/> Fully trust            |  | <input type="radio"/> Trustworthy             |  | <input type="radio"/> Trust it a bit |  |
|                                                                          |                                                                                                                 | <input type="radio"/> Do not trust it at all |  | <input type="radio"/> Have no knowledge of it |  |                                      |  |
| Q26                                                                      | Are you willingness to participate in programs that support the use of treated wastewater?                      | <input type="radio"/> Yes                    |  | <input type="radio"/> No                      |  | <input type="radio"/> May be         |  |

| Section 4: Respondent's trust in usage of treated wastewater for different purposes |                                                                                                        |                                        |                               |                                     |                                    |
|-------------------------------------------------------------------------------------|--------------------------------------------------------------------------------------------------------|----------------------------------------|-------------------------------|-------------------------------------|------------------------------------|
| <b>Q27</b>                                                                          | <b>How will you trust using treated wastewater for irrigation?</b>                                     |                                        |                               |                                     |                                    |
| Q27-1                                                                               | Irrigation of food crops                                                                               | <input type="radio"/> Strongly support | <input type="radio"/> Support | <input type="radio"/> Don't support | <input type="radio"/> I don't know |
| Q27-2                                                                               | Irrigation of non-food crops                                                                           | <input type="radio"/> Strongly support | <input type="radio"/> Support | <input type="radio"/> Don't support | <input type="radio"/> I don't know |
| Q27-3                                                                               | Irrigation of public parks                                                                             | <input type="radio"/> Strongly support | <input type="radio"/> Support | <input type="radio"/> Don't support | <input type="radio"/> I don't know |
| Q27-4                                                                               | Animal crops                                                                                           | <input type="radio"/> Strongly support | <input type="radio"/> Support | <input type="radio"/> Don't support | <input type="radio"/> I don't know |
| Q27-5                                                                               | Irrigation All crops                                                                                   | <input type="radio"/> Strongly support | <input type="radio"/> Support | <input type="radio"/> Don't support | <input type="radio"/> I don't know |
| <b>Q28</b>                                                                          | <b>How confident with using treated wastewater for industry and commerce?</b>                          |                                        |                               |                                     |                                    |
| Q28-1                                                                               | Cooling (e.g. cooling of power plants - cooling machines ....)                                         | <input type="radio"/> Strongly support | <input type="radio"/> Support | <input type="radio"/> Don't support | <input type="radio"/> I don't know |
| Q28-2                                                                               | Construction work (such as: construction work - mixing concrete...)                                    | <input type="radio"/> Strongly support | <input type="radio"/> Support | <input type="radio"/> Don't support | <input type="radio"/> I don't know |
| Q28-3                                                                               | Power plants (e.g. steam production .....)                                                             | <input type="radio"/> Strongly support | <input type="radio"/> Support | <input type="radio"/> Don't support | <input type="radio"/> I don't know |
| Q28-4                                                                               | Car wash                                                                                               | <input type="radio"/> Strongly support | <input type="radio"/> Support | <input type="radio"/> Don't support | <input type="radio"/> I don't know |
| Q28-5                                                                               | Clothes Laundries                                                                                      | <input type="radio"/> Strongly support | <input type="radio"/> Support | <input type="radio"/> Don't support | <input type="radio"/> I don't know |
| Q28-6                                                                               | Cleaning (street cleaning - cleaning workshops and garages - cleaning poultry farms .....)             | <input type="radio"/> Strongly support | <input type="radio"/> Support | <input type="radio"/> Don't support | <input type="radio"/> I don't know |
| Q28-7                                                                               | Fire Fighting                                                                                          | <input type="radio"/> Strongly support | <input type="radio"/> Support | <input type="radio"/> Don't support | <input type="radio"/> I don't know |
| <b>Q29</b>                                                                          | <b>How confident with using treated wastewater for the following purposes?</b>                         |                                        |                               |                                     |                                    |
| Q29-1                                                                               | Artificial lakes                                                                                       | <input type="radio"/> Strongly Support | <input type="radio"/> Support | <input type="radio"/> Don't support | <input type="radio"/> I don't know |
| Q29-2                                                                               | Swimming Pools                                                                                         | <input type="radio"/> Strongly Support | <input type="radio"/> Support | <input type="radio"/> Don't support | <input type="radio"/> I don't know |
| Q29-3                                                                               | Fish Farms                                                                                             | <input type="radio"/> Strongly Support | <input type="radio"/> Support | <input type="radio"/> Don't support | <input type="radio"/> I don't know |
| Q29-4                                                                               | Household uses (e.g. bathing .....)                                                                    | <input type="radio"/> Strongly Support | <input type="radio"/> Support | <input type="radio"/> Don't support | <input type="radio"/> I don't know |
| Q29-5                                                                               | Storage for emergency                                                                                  | <input type="radio"/> Strongly Support | <input type="radio"/> Support | <input type="radio"/> Don't support | <input type="radio"/> I don't know |
| Q29-6                                                                               | Drinking animals and birds                                                                             | <input type="radio"/> Strongly Support | <input type="radio"/> Support | <input type="radio"/> Don't support | <input type="radio"/> I don't know |
| Q29-7                                                                               | Washing vegetables and fruits                                                                          | <input type="radio"/> Strongly Support | <input type="radio"/> Support | <input type="radio"/> Don't support | <input type="radio"/> I don't know |
| Q29-8                                                                               | Cooking                                                                                                | <input type="radio"/> Strongly Support | <input type="radio"/> Support | <input type="radio"/> Don't support | <input type="radio"/> I don't know |
| Q29-9                                                                               | Flushing toilet                                                                                        | <input type="radio"/> Strongly Support | <input type="radio"/> Support | <input type="radio"/> Don't support | <input type="radio"/> I don't know |
| <b>Q30</b>                                                                          | <b>The extent to which you support the use of treated wastewater for achieving the following goals</b> |                                        |                               |                                     |                                    |
| Q30-1                                                                               | Preserving the environment                                                                             | <input type="radio"/> strongly support | <input type="radio"/> support | <input type="radio"/> Don't support | <input type="radio"/> I don't know |
| Q30-2                                                                               | Easing pressure on groundwater and high-cost desalinated water                                         | <input type="radio"/> strongly support | <input type="radio"/> support | <input type="radio"/> Don't support | <input type="radio"/> I don't know |
| Q30-3                                                                               | Reducing pollution                                                                                     | <input type="radio"/> strongly support | <input type="radio"/> support | <input type="radio"/> Don't support | <input type="radio"/> I don't know |
| Q30-4                                                                               | Giving up the purchase of chemical fertilizers harmful to Public health                                | <input type="radio"/> strongly support | <input type="radio"/> support | <input type="radio"/> Don't support | <input type="radio"/> I don't know |

| Section 5: Participants' opinion regarding the incentive for encouraging the public to reuse treated wastewater and the barriers preventing public from reusing treated wastewater |                                                                                                                                                                                         |                             |                              |                             |                              |
|------------------------------------------------------------------------------------------------------------------------------------------------------------------------------------|-----------------------------------------------------------------------------------------------------------------------------------------------------------------------------------------|-----------------------------|------------------------------|-----------------------------|------------------------------|
| <b>31</b>                                                                                                                                                                          | <b>Arrange these incentives, in your view, to promote the use of treated wastewater by the general population (1 is the highest and 4 is the lowest)</b>                                |                             |                              |                             |                              |
| Q31-1                                                                                                                                                                              | Reduce cost                                                                                                                                                                             | <input type="radio"/> First | <input type="radio"/> Second | <input type="radio"/> Third | <input type="radio"/> Fourth |
| Q31-2                                                                                                                                                                              | Additional water resources                                                                                                                                                              | <input type="radio"/> First | <input type="radio"/> Second | <input type="radio"/> Third | <input type="radio"/> Fourth |
| Q31-3                                                                                                                                                                              | Reduce pressure on other water resources                                                                                                                                                | <input type="radio"/> First | <input type="radio"/> Second | <input type="radio"/> Third | <input type="radio"/> Fourth |
| Q31-4                                                                                                                                                                              | Reducing environmental damage                                                                                                                                                           | <input type="radio"/> First | <input type="radio"/> Second | <input type="radio"/> Third | <input type="radio"/> Fourth |
| <b>Q32</b>                                                                                                                                                                         | <b>From your point of view, what is the single most significant obstacle to the general public's willingness to utilise treated wastewater ? (1 is the highest and 3 is the lowest)</b> |                             |                              |                             |                              |
| Q32-1                                                                                                                                                                              | Transmission of infectious diseases                                                                                                                                                     | <input type="radio"/> First | <input type="radio"/> Second | <input type="radio"/> Third |                              |
| Q32-2                                                                                                                                                                              | Quality and performance standards                                                                                                                                                       | <input type="radio"/> First | <input type="radio"/> Second | <input type="radio"/> Third |                              |
| Q32-3                                                                                                                                                                              | Ethical considerations or cultural issue                                                                                                                                                | <input type="radio"/> First | <input type="radio"/> Second | <input type="radio"/> Third |                              |
